# Supplementary material
Source: PubMed Central journal article supplement (PMC4787348)
Supplement: hayg621094.ww1_default.pdf [file hayg621094.ww1_default.pdf]

### Reference list of Included studies [posted as supplied by author]

- w1 Kiderman A, Yaphe J, Bregman J, Zemel T, Furst AL. Adjuvant prednisone therapy in pharyngitis: a randomised controlled trial from general practice.[see comment]. *British Journal of General Practice* 2005; 55(512):218-221.
- w2 Niland ML, Bonsu BK, Nuss KE, Goodman DG. A pilot study of 1 versus 3 days of dexamethasone as add-on therapy in children with streptococcal pharyngitis. *Pediatric Infectious Disease Journal* 2006; 25(6):477-481.
- w3 Bulloch B, Kabani A, Tenenbein M. Oral dexamethasone for the treatment of pain in children with acute pharyngitis: a randomized, double-blind, placebo-controlled trial.[see comment]. *Annals of Emergency Medicine* 2003; 41(5):601-608.
- w4 Marvez-Valls EG, Ernst AA, Gray J, Johnson WD. The role of betamethasone in the treatment of acute exudative pharyngitis.[see comment]. *Academic Emergency Medicine* 1998; 5(6):567-572.
- w5 Olympia RP, Khine H, Avner JR. Effectiveness of oral dexamethasone in the treatment of moderate to severe pharyngitis in children. *Archives of Pediatrics & Adolescent Medicine* 2005; 159(3):278-282.
- w6 Wei JL, Kasperbauer JL, Weaver AL, Boggust AJ. Efficacy of single-dose dexamethasone as adjuvant therapy for acute pharyngitis. *Laryngoscope* 2002; 112(1):87-93.
- w7 Tasar A, Yanturali S, Topacoglu H, Ersoy G, Unverir P, Sarikaya S. Clinical efficacy of dexamethasone for acute exudative pharyngitis. *J Emerg Med* 2008;35:363-7.
- w8 O'Brien JF, Meade JL, Falk JL. Dexamethasone as adjuvant therapy for severe acute pharyngitis. *Annals of Emergency Medicine* 1993; 22(2):212-215.
